# Supplementary material
Source: MDPI journal article supplement (https://www.mdpi.com/2076-3417/11/15/6849)
Supplement: s1 [file s1]

|    |                                                                                                                                                                                                                                                                                                                                                                                                                                                                                                                                                                                                                                                                                                                                                                                                                                                                                   |
|----|-----------------------------------------------------------------------------------------------------------------------------------------------------------------------------------------------------------------------------------------------------------------------------------------------------------------------------------------------------------------------------------------------------------------------------------------------------------------------------------------------------------------------------------------------------------------------------------------------------------------------------------------------------------------------------------------------------------------------------------------------------------------------------------------------------------------------------------------------------------------------------------|
| A. | $A_{\text{cone surface}} = \pi r g$                                                                                                                                                                                                                                                                                                                                                                                                                                                                                                                                                                                                                                                                                                                                                                                                                                               |
| B. | $\frac{H-h}{r_2} = \frac{H}{r_1} (=) (H-h)r_1 = r_2 H (=) H r_1 - r_2 H = h r_1 (=) H(r_1 - r_2) = h r_1 (=) H = \frac{h r_1}{r_1 - r_2}$ <p>1. CORONAL<br/>ADHESION AREA<br/>APICAL</p> <p>2. H, h, r1, r2, g1, g2</p> <p>3. r1, r2, h, g1-g2</p>                                                                                                                                                                                                                                                                                                                                                                                                                                                                                                                                                                                                                                |
| C. | $g_1^2 = H^2 + r_1^2 (=) g_1 = \sqrt{H^2 + r_1^2}$ $g_2^2 = (H-h)^2 + r_2^2 (=) g_2 = \sqrt{(H-h)^2 + r_2^2}$                                                                                                                                                                                                                                                                                                                                                                                                                                                                                                                                                                                                                                                                                                                                                                     |
| D. | $A_{\text{Adhesion}} = \pi r_1 g_1 - \pi r_2 g_2 (=)$ $ (=) \sqrt{H^2 + r_1^2} \pi r_1 - \sqrt{(H-h)^2 + r_2^2} \pi r_2 (=)$ $ (=) \sqrt{\left(\frac{h r_1}{r_1 - r_2}\right)^2 + r_1^2} \pi r_1 - \sqrt{\left(\frac{h r_1}{r_1 - r_2} - h\right)^2 + r_2^2} \pi r_2 (=)$ $ (=) \sqrt{\frac{h^2 r_1^2}{(r_1 - r_2)^2} + r_1^2} \pi r_1 - \sqrt{\frac{(h r_1 - h r_1 + h r_2)^2}{r_1 - r_2} + r_2^2} \pi r_2 (=)$ $ (=) \frac{1}{r_1 - r_2} (\sqrt{h^2 r_1^2 + r_1^2 (r_1 - r_2)^2} \pi r_1 - \sqrt{h^2 r_2^2 + r_2^2 (r_1 - r_2)^2} \pi r_2 (=)$ $ (=) \frac{\pi}{(r_1 - r_2)} (r_1 \sqrt{h^2 + (r_1 - r_2)^2} r_1 - r_2 \sqrt{h^2 (r_1 - r_2)^2} r_2 (=)$ $ (=) \frac{\pi}{(r_1 - r_2)} (\sqrt{h^2 + (r_1 - r_2)^2} (r_1^2 - r_2^2) (=)$ $ (=) \frac{\pi \sqrt{h^2 + (r_1 - r_2)^2}}{(r_1 - r_2)} (r_1 - r_2) (r_1 + r_2) (=)$ $ (=) \pi \sqrt{h^2 + (r_1 - r_2)^2} (r_1 + r_2)$ |

**Figure S1.** (A) Formula for cone's lateral surface area calculation; (B) Triangles similarity (1 – Representation of root canal taper; 2 – Schematic representation of triangle similarity; 3 – Specimen representative longitudinal section); (C) Pythagorean theorem; (D) Adhesion area formula.

**Table S1.** Calcium silicate-based materials specifics.

| Calcium silicate-based material | Manufacturer                                                        | Composition                                                                                                                                                                                              | Preparation instructions                                                                                       | Lot number | Expiration date |
|---------------------------------|---------------------------------------------------------------------|----------------------------------------------------------------------------------------------------------------------------------------------------------------------------------------------------------|----------------------------------------------------------------------------------------------------------------|------------|-----------------|
| ProRoot MTA®                    | Dentsply Maillefer,<br>Tulsa, Oklahoma,<br>United States of America | Powder: Portland cement,<br>bismuth oxide, calcium sulfate<br>dihydrate or gypsum, tricalcium<br>silicate, dicalcium silicate,<br>tricalcium aluminate,<br>tetracalcium aluminoferrite.<br>Liquid: water | Mixed powder/liquid ratio 1:3                                                                                  | 177918     | 08/2020         |
| TotalFill® BC Putty             | FKG,<br>La Chaux-des-Fonds,<br>Switzerland                          | Tricalcium silicate, zirconium<br>oxide, tantalum pentoxide,<br>dicalcium silicate, and calcium<br>sulfate.                                                                                              | Pre-mixed, ready-to-use, scoopable<br>material                                                                 | 1702BPP    | 11/2019         |
| Biodentine™                     | Septodont,<br>Saint-Maur-des-Fossés<br>Cedex, France                | Powder: tricalcium silicate,<br>zirconium oxide, calcium oxide,<br>calcium carbonate and<br>colorings.<br>Aqueous solution: calcium<br>chloride and polycarboxylate.                                     | 1. Pour 5 drops of liquid into the capsule<br>2. Place the capsule on a mixing device<br>3. Mix for 30 seconds | B21183     | 06/2019         |
